# Supplementary material
Source: Springer Nature journal article supplement (http://www.springermedizin.de/resource/supplementary/12943_2013_1141_MOESM15_ESM.pdf/9552590)
Supplement: MOESM15 [file 9552590]

# Insulin

PI3K/mTOR/HIF1

ROS

↑ PKM2  
expression

↓ PKM2  
activity

↑ Glucose uptake and  
lactate production

↑ Glycolytic and  
NADPH pooling

Enhanced Cancer  
Metabolism
